# Supplementary material for: The European TauroPace™ Registry
Source: MDPI journal article supplement (doi:10.3390/mps6050086), 2023-09-15
Supplement: s1 [file s1]

## Supplementary Materials

**Table S1:** Intercurrent events, their handling, and the rationale in the analysis of all-cause mortality after CIED procedures using TP between procedures touching the pocket. The prevented bias is the bias that would have been incurred without action. The possible bias is a bias that may be incurred by the action. CI = confidence interval, MNAR = missing not at random, MAR = missing at random.

| Intercurrent event                            | Prevented bias    | Action         | Analysis strategy | Missingness assumed | Possible bias |
|-----------------------------------------------|-------------------|----------------|-------------------|---------------------|---------------|
| Other or no disinfectant                      | Upward            | No follow up   | Principle stratum | MNAR                | Downward      |
| No permanent implantation                     | Downward          | No follow up   | Principle stratum | MNAR                | Upward        |
| Conversion to open surgery                    | Upward            | Full follow up | Treatment policy  | --                  | Upward        |
| Antibiosis for infections not related to CIED | ?                 | Full follow up | Treatment policy  | --                  | ?             |
| Pocket hematoma, septic thrombophlebitis      | ?                 | Full follow up | Treatment policy  | --                  | ?             |
| Minor CIED infection                          | ?                 | Full follow up | Treatment policy  | --                  | ?             |
| Box exchange                                  | ?                 | Competing risk | Hybrid            | MNAR                | Wide CI       |
| System modification                           | Upward            | Competing risk | Hybrid            | MNAR                | Wide CI       |
| Other intervention touching the CIED pocket   | Upward            | Competing risk | Hybrid            | MNAR                | Wide CI       |
| Major CIED infection                          | Upward            | Competing risk | Hybrid            | MNAR                | Wide CI       |
| Lost to follow up                             | Upward, narrow CI | Censoring      | Treatment policy  | MAR                 | Wide CI       |
